# Supplementary material for: Contradiction between Plastid Gene Transcription and Function Due to Complex Posttranscriptional Splicing: An Exemplary Study of ycf15 Function and Evolution in Angiosperms
Source: PubMed Central journal article supplement (PMC3601113; doi:10.1371/journal.pone.0059620), 2013-03-18

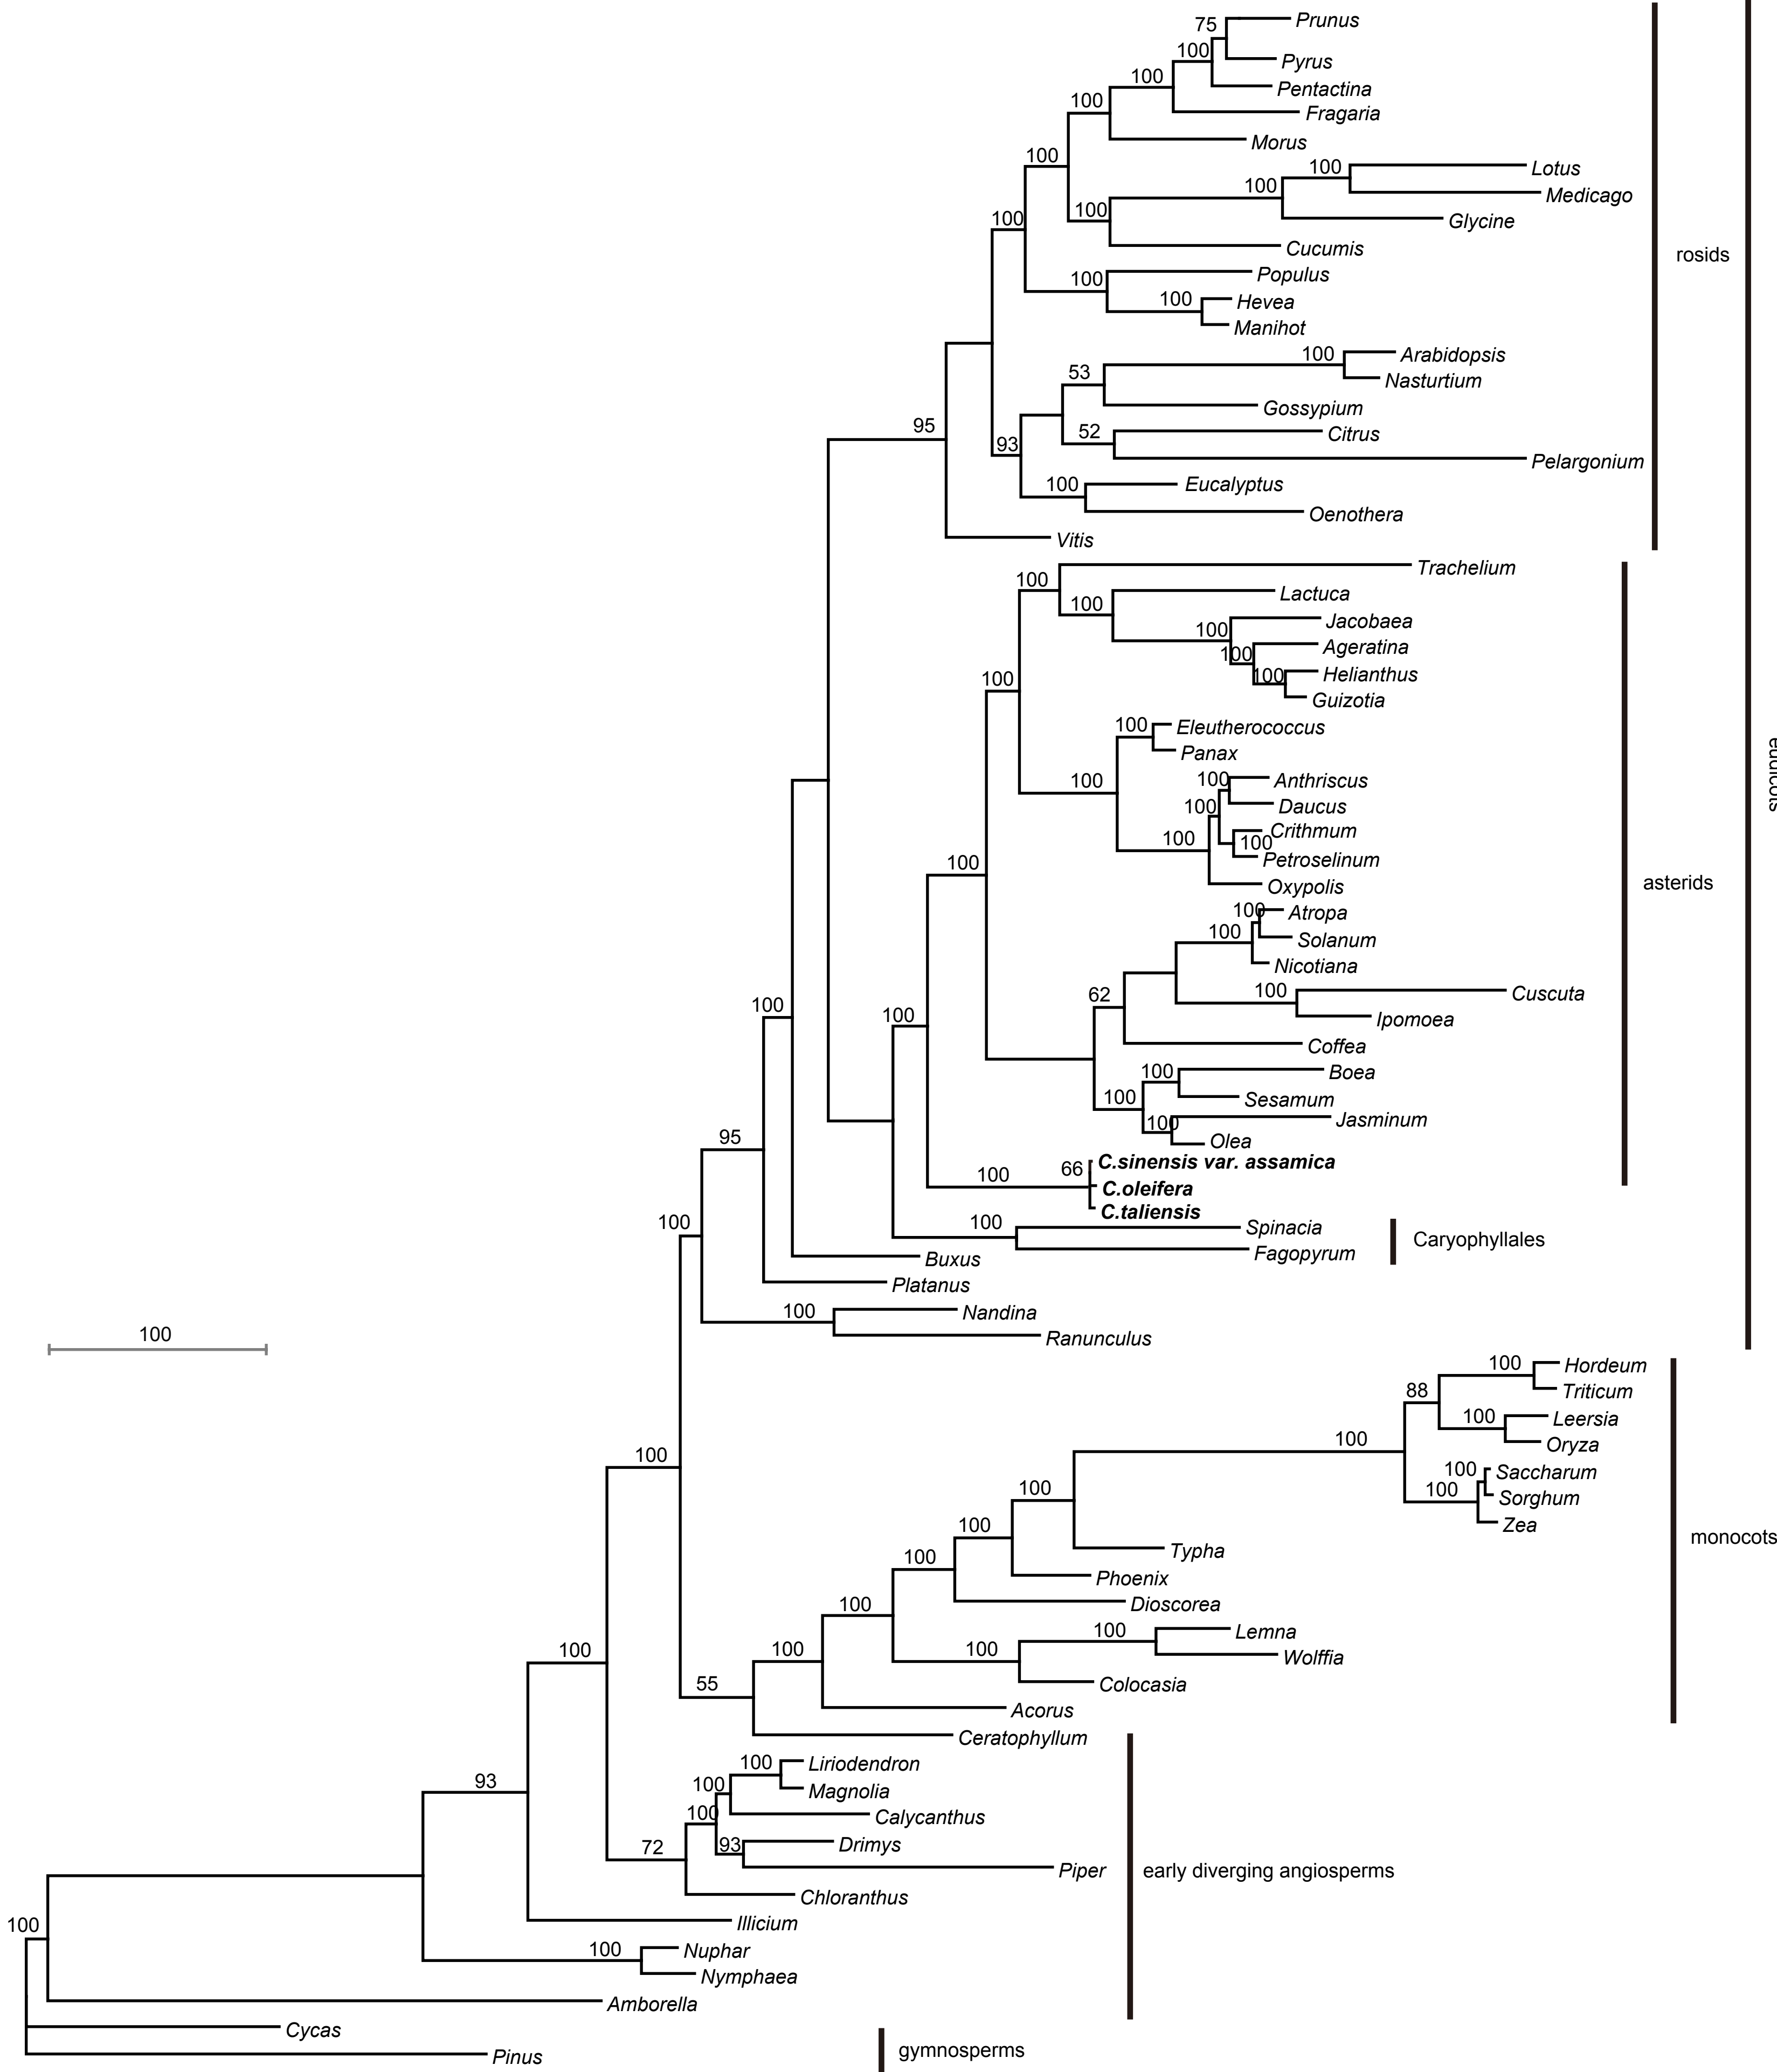

Supplement: pone.0059620.s002.pdf [file pone.0059620.s002.pdf]
