# Supplementary material for: Contradiction between Plastid Gene Transcription and Function Due to Complex Posttranscriptional Splicing: An Exemplary Study of ycf15 Function and Evolution in Angiosperms
Source: PubMed Central journal article supplement (PMC3601113; doi:10.1371/journal.pone.0059620), 2013-03-18
Supplement: pone.0059620.s004.pdf [file pone.0059620.s004.pdf]

**Table S1 –Transcriptome reads mapping of the *Camellia sinensis* var. *assamica* chloroplast genome.**

| <b>Gene name</b> | <b>Strand</b> | <b>Start position (bp)</b> | <b>End position (bp)</b> | <b>Gene size (bp)</b> | <b>Reads number</b> | <b>Coverage<sup>a</sup></b> | <b>Reads number</b> | <b>Coverage<sup>b</sup></b> |
|------------------|---------------|----------------------------|--------------------------|-----------------------|---------------------|-----------------------------|---------------------|-----------------------------|
| <i>trnH-GUG</i>  | -             | 3                          | 77                       | 74                    | 12                  | 78.67%                      | 70                  | 100%                        |
| <i>psbA</i>      | -             | 463                        | 1521                     | 1058                  | 5984                | 100%                        | 329                 | 100%                        |
| <i>trnK-UUU</i>  | -             | 1742                       | 1776                     | 34                    | 14                  | 100%                        | 3                   | 100%                        |
| <i>matK</i>      | -             | 2048                       | 3547                     | 1499                  | 426                 | 100%                        | 86                  | 70%                         |
| <i>trnK-UUU</i>  | -             | 4264                       | 4300                     | 36                    | 35                  | 100%                        | 22                  | 100%                        |
| <i>rps16</i>     | -             | 5056                       | 6178                     | 1122                  | 275                 | 100%                        | 315                 | 100%                        |
| <i>trnQ-UUG</i>  | -             | 7793                       | 7864                     | 71                    | 4                   | 100%                        | 5                   | 100%                        |
| <i>psbK</i>      | +             | 8198                       | 8383                     | 185                   | 127                 | 100%                        | 65                  | 100%                        |
| <i>psbI</i>      | +             | 8780                       | 8890                     | 110                   | 32                  | 100%                        | 21                  | 100%                        |
| <i>trnS-GCU</i>  | -             | 9033                       | 9120                     | 87                    | 47                  | 100%                        | 94                  | 100%                        |
| <i>trnG-GCC</i>  | +             | 9796                       | 9818                     | 22                    | 13                  | 100%                        | 18                  | 100%                        |
| <i>trnG-GCC</i>  | +             | 10524                      | 10560                    | 36                    | 11                  | 100%                        | 28                  | 100%                        |
| <i>trnR-UCU</i>  | +             | 10812                      | 10883                    | 71                    | 15                  | 100%                        | 25                  | 100%                        |
| <i>atpA</i>      | -             | 10997                      | 12520                    | 1523                  | 1625                | 100%                        | 590                 | 100%                        |
| <i>atpF</i>      | -             | 12580                      | 13850                    | 1270                  | 951                 | 100%                        | 1578                | 100%                        |
| <i>atpH</i>      | -             | 14227                      | 14472                    | 245                   | 686                 | 100%                        | 353                 | 100%                        |
| <i>atpI</i>      | -             | 15577                      | 16320                    | 743                   | 674                 | 100%                        | 1115                | 100%                        |
| <i>rps2</i>      | -             | 16530                      | 17240                    | 710                   | 1808                | 100%                        | 196                 | 100%                        |
| <i>rpoC2</i>     | -             | 17487                      | 21611                    | 4124                  | 1634                | 100%                        | 359                 | 88%                         |
| <i>rpoC1</i>     | -             | 21789                      | 24581                    | 2792                  | 356                 | 100%                        | 65                  | 92.62%                      |
| <i>rpoB</i>      | -             | 24608                      | 27820                    | 3212                  | 521                 | 100%                        | 65                  | 63.52%                      |
| <i>trnC-GCA</i>  | +             | 29056                      | 29136                    | 80                    | 8                   | 100%                        | 11                  | 100%                        |
| <i>petN</i>      | +             | 29846                      | 29935                    | 89                    | 8                   | 100%                        | 0                   | 0%                          |
| <i>psbM</i>      | -             | 31018                      | 31122                    | 104                   | 58                  | 100%                        | 99                  | 100%                        |
| <i>trnD-GUC</i>  | -             | 31950                      | 32023                    | 73                    | 12                  | 100%                        | 3                   | 45.95%                      |
| <i>trnY-GUA</i>  | -             | 32136                      | 32219                    | 83                    | 15                  | 100%                        | 6                   | 100%                        |
| <i>trnE-UUC</i>  | -             | 32279                      | 32351                    | 72                    | 4                   | 91.78%                      | 4                   | 97.26%                      |
| <i>trnT-GGU</i>  | +             | 33125                      | 33196                    | 71                    | 0                   | 0%                          | 20                  | 100%                        |
| <i>psbD</i>      | +             | 34715                      | 35776                    | 1061                  | 1898                | 100%                        | 4040                | 100%                        |
| <i>psbC</i>      | +             | 35724                      | 37145                    | 1421                  | 3580                | 100%                        | 3549                | 100%                        |
| <i>trnS-UGA</i>  | -             | 37378                      | 37469                    | 91                    | 106                 | 100%                        | 340                 | 100%                        |
| <i>psbZ</i>      | +             | 37825                      | 38013                    | 188                   | 306                 | 100%                        | 880                 | 100%                        |
| <i>trnG-UCC</i>  | +             | 38285                      | 38355                    | 70                    | 37                  | 100%                        | 69                  | 100%                        |
| <i>trnM-CAU</i>  | -             | 38517                      | 38590                    | 73                    | 10                  | 100%                        | 129                 | 100%                        |
| <i>rps14</i>     | -             | 38744                      | 39046                    | 302                   | 869                 | 100%                        | 2711                | 100%                        |
| <i>psaB</i>      | -             | 39170                      | 41374                    | 2204                  | 11265               | 100%                        | 366                 | 100%                        |

|                 |   |       |       |      |       |         |       |        |
|-----------------|---|-------|-------|------|-------|---------|-------|--------|
| <i>psaA</i>     | - | 41400 | 43652 | 2252 | 11377 | 100%    | 358   | 99.91% |
| <i>ycf3</i>     | - | 44441 | 46404 | 1963 | 592   | 100%    | 4028  | 100%   |
| <i>trnS-GGA</i> | + | 47253 | 47339 | 86   | 31    | 100%    | 8     | 96.55% |
| <i>rps4</i>     | - | 47632 | 48237 | 605  | 44    | 100%    | 26    | 78.38% |
| <i>trnT-UGU</i> | - | 48571 | 48643 | 72   | 0     | 0%      | 14    | 100%   |
| <i>trnL-UAA</i> | + | 49624 | 49660 | 36   | 18    | 100%    | 382   | 100%   |
| <i>trnL-UAA</i> | + | 50184 | 50233 | 49   | 12    | 100%    | 38    | 100%   |
| <i>trnF-GAA</i> | + | 50606 | 50678 | 72   | 10    | 100%    | 3     | 97.26% |
| <i>ndhJ</i>     | - | 51346 | 51822 | 476  | 105   | 100%    | 92    | 100%   |
| <i>ndhK</i>     | - | 51928 | 52776 | 848  | 222   | 100%    | 402   | 100%   |
| <i>ndhC</i>     | - | 52656 | 53018 | 362  | 74    | 100%    | 204   | 100%   |
| <i>trnV-UAC</i> | - | 53374 | 54035 | 74   | 23    | 100.00% | 88    | 100%   |
| <i>trnM-CAU</i> | + | 54202 | 54273 | 71   | 6     | 100%    | 152   | 100%   |
| <i>atpE</i>     | - | 54477 | 54878 | 401  | 1991  | 100%    | 5293  | 100%   |
| <i>atpB</i>     | - | 54875 | 56371 | 1496 | 14998 | 100%    | 17960 | 100%   |
| <i>rbcl</i>     | + | 57124 | 58551 | 1427 | 17530 | 100%    | 773   | 100%   |
| <i>accD</i>     | + | 59131 | 60621 | 1490 | 570   | 100%    | 234   | 100%   |
| <i>psaI</i>     | + | 61363 | 61473 | 110  | 17    | 100%    | 7     | 100%   |
| <i>ycf4</i>     | + | 61894 | 62448 | 554  | 319   | 100%    | 38    | 100%   |
| <i>cemA</i>     | + | 63348 | 64043 | 695  | 129   | 100%    | 96    | 100%   |
| <i>petA</i>     | + | 64283 | 65245 | 962  | 464   | 100%    | 148   | 95.12% |
| <i>psbJ</i>     | - | 66282 | 66404 | 122  | 137   | 100%    | 72    | 100%   |
| <i>psbL</i>     | - | 66535 | 66651 | 116  | 175   | 100%    | 27    | 100%   |
| <i>psbF</i>     | - | 66674 | 66793 | 119  | 249   | 100%    | 30    | 100%   |
| <i>psbE</i>     | - | 66803 | 67054 | 251  | 488   | 100%    | 51    | 100%   |
| <i>petL</i>     | + | 68347 | 68442 | 95   | 1     | 2.08%   | 1     | 50%    |
| <i>petG</i>     | + | 68625 | 68738 | 113  | 39    | 100%    | 54    | 100%   |
| <i>trnW-CCA</i> | - | 68862 | 68935 | 73   | 19    | 100%    | 22    | 100%   |
| <i>trnP-UGG</i> | - | 69106 | 69179 | 73   | 56    | 100%    | 21    | 100%   |
| <i>psaJ</i>     | + | 69570 | 69704 | 134  | 167   | 100%    | 469   | 100%   |
| <i>rpl33</i>    | + | 70159 | 70359 | 200  | 33    | 100%    | 107   | 100%   |
| <i>rps18</i>    | + | 70537 | 70842 | 305  | 73    | 100%    | 72    | 100%   |
| <i>rpl20</i>    | - | 71105 | 71458 | 353  | 51    | 100%    | 137   | 100%   |
| <i>ψrps12</i>   | - | 72239 | 72352 | 113  | 28    | 100%    | 40    | 100%   |
| <i>clpP</i>     | - | 72502 | 74482 | 1980 | 173   | 100%    | 283   | 100%   |
| <i>psbB</i>     | + | 74935 | 76461 | 1526 | 7894  | 100%    | 382   | 100%   |
| <i>psbT</i>     | + | 76643 | 76750 | 107  | 65    | 100%    | 13    | 100%   |
| <i>psbN</i>     | - | 76806 | 76937 | 131  | 67    | 100%    | 44    | 100%   |
| <i>psbH</i>     | + | 77040 | 77261 | 221  | 184   | 100%    | 75    | 100%   |
| <i>petB</i>     | + | 77385 | 78809 | 1424 | 1320  | 100%    | 345   | 97.33% |
| <i>petD</i>     | + | 78998 | 80228 | 1230 | 631   | 100%    | 162   | 100%   |
| <i>rpoA</i>     | - | 80434 | 81441 | 1007 | 4706  | 100%    | 2177  | 100%   |
| <i>rps11</i>    | - | 81507 | 81923 | 416  | 9897  | 100%    | 2365  | 100%   |
| <i>rpl36</i>    | - | 82038 | 82151 | 113  | 1245  | 100%    | 810   | 100%   |

|                 |   |        |        |      |        |        |       |        |
|-----------------|---|--------|--------|------|--------|--------|-------|--------|
| <i>infA</i>     | - | 82268  | 82501  | 233  | 6019   | 100%   | 1808  | 100%   |
| <i>rps8</i>     | - | 82623  | 83030  | 407  | 6316   | 100%   | 5543  | 100%   |
| <i>rpl14</i>    | - | 83220  | 83588  | 368  | 9435   | 100%   | 3791  | 100%   |
| <i>rpl16</i>    | - | 83701  | 85130  | 1429 | 15240  | 100%   | 8782  | 100%   |
| <i>rps3</i>     | - | 85259  | 85915  | 656  | 1611   | 100%   | 2349  | 100%   |
| <i>rpl22</i>    | - | 85900  | 86367  | 467  | 1048   | 100%   | 1567  | 100%   |
| <i>rps19</i>    | - | 86419  | 86697  | 278  | 671    | 100%   | 1605  | 100%   |
| <i>rpl2</i>     | - | 86758  | 88252  | 1494 | 13889  | 100%   | 7762  | 100%   |
| <i>rpl23</i>    | - | 88271  | 88552  | 281  | 1613   | 100%   | 1115  | 100%   |
| <i>trnI-CAU</i> | - | 88718  | 88791  | 73   | 44     | 100%   | 5     | 96.19% |
| <i>ycf2</i>     | + | 88880  | 95776  | 6896 | 3231   | 100%   | 462   | 87.77% |
| <i>ycf15</i>    | + | 95857  | 96105  | 248  | 84     | 100%   | 22    | 97.57% |
| <i>trnL-CAA</i> | - | 96476  | 96556  | 80   | 9      | 100%   | 6     | 98.83% |
| <i>ndhB</i>     | - | 97113  | 99324  | 2211 | 1292   | 100%   | 5815  | 100%   |
| <i>rps7</i>     | - | 99650  | 100117 | 467  | 1808   | 100%   | 9621  | 100%   |
| <i>ψrps12</i>   | - | 100713 | 100964 | 251  | 2425   | 100%   | 9699  | 100%   |
| <i>trnV-GAC</i> | + | 102809 | 102880 | 71   | 12     | 100%   | 4     | 72.78% |
| <i>rrn16</i>    | + | 103108 | 104597 | 1489 | 187198 | 100%   | 10356 | 100%   |
| <i>trnI-GAU</i> | + | 104894 | 104935 | 75   | 4071   | 100%   | 188   | 100%   |
| <i>trnA-UGC</i> | + | 105981 | 106018 | 37   | 2511   | 100%   | 116   | 100%   |
| <i>orf42</i>    | - | 106148 | 106276 | 128  | 5685   | 100%   | 207   | 100%   |
| <i>trnA-UGC</i> | + | 106831 | 106865 | 34   | 2203   | 100%   | 44    | 100%   |
| <i>rrn23</i>    | + | 107018 | 109826 | 2808 | 438212 | 100%   | 78277 | 100%   |
| <i>rrn4.5</i>   | + | 109925 | 110027 | 102  | 2653   | 100%   | 401   | 100%   |
| <i>rrn5</i>     | + | 110248 | 110368 | 120  | 112    | 100%   | 50    | 100%   |
| <i>trnR-ACG</i> | + | 110622 | 110695 | 73   | 30     | 100%   | 117   | 100%   |
| <i>trnN-GUU</i> | - | 111291 | 111362 | 71   | 64     | 100%   | 142   | 100%   |
| <i>ψycf1</i>    | + | 111675 | 112730 | 1055 | 672    | 100%   | 1922  | 100%   |
| <i>ndhF</i>     | - | 112800 | 115046 | 2246 | 352    | 100%   | 326   | 79.88% |
| <i>rpl32</i>    | + | 115726 | 115887 | 161  | 33     | 100%   | 21    | 100%   |
| <i>trnL-UAG</i> | + | 116809 | 116888 | 79   | 404    | 100%   | 205   | 100%   |
| <i>ccsA</i>     | + | 116978 | 117943 | 965  | 32     | 77.85% | 70    | 83.44% |
| <i>ndhD</i>     | - | 118182 | 119696 | 1514 | 47     | 88.58% | 47    | 66.07% |
| <i>psaC</i>     | - | 119825 | 120070 | 245  | 90     | 100%   | 72    | 100%   |
| <i>ndhE</i>     | - | 120301 | 120606 | 305  | 18     | 90.52% | 50    | 100%   |
| <i>ndhG</i>     | - | 120841 | 121371 | 530  | 31     | 100%   | 61    | 100%   |
| <i>ndhI</i>     | - | 121766 | 122269 | 503  | 108    | 100%   | 330   | 100%   |
| <i>ndhA</i>     | - | 122364 | 124539 | 2175 | 307    | 100%   | 4389  | 100%   |
| <i>ndhH</i>     | - | 124541 | 125722 | 1181 | 997    | 100%   | 2062  | 100%   |
| <i>rps15</i>    | - | 125815 | 126087 | 272  | 210    | 100%   | 715   | 100%   |
| <i>ycf1</i>     | - | 126470 | 132097 | 5627 | 4112   | 96.94% | 22890 | 100%   |

<sup>a</sup> Transcriptome reads were from *C. sinensis* var. *assamica* and <sup>b</sup> *C. Sinensis* var.

*sinensis*.
