# Supplementary material for: Contradiction between Plastid Gene Transcription and Function Due to Complex Posttranscriptional Splicing: An Exemplary Study of ycf15 Function and Evolution in Angiosperms
Source: PubMed Central journal article supplement (PMC3601113; doi:10.1371/journal.pone.0059620), 2013-03-18
Supplement: pone.0059620.s005.pdf [file pone.0059620.s005.pdf]

**Table S2 – Primers used for validating genome assembly and gaps closing.***C. sinensis var. assamica*

| <b>primer</b> | <b>forward</b>                | <b>reverse</b>              | <b>position</b> |
|---------------|-------------------------------|-----------------------------|-----------------|
| <b>as1</b>    | CACTGCCTTGATCCAATT G          | CAT TAA CCG TGC TAA CCT TG  | 46 - 562        |
| <b>as2</b>    | CGA ACCCAT CAT TTA CCT        | CAT CTA TCC CAA TGA GCC     | 4517 - 5294     |
| <b>as3</b>    | CCA AGA GCA CCT TCA TTC C     | GGA ACA TAG AGC ACA AGG AT  | 6065 - 7584     |
| <b>as4</b>    | AAC GAG ACG GAA GGA TTT       | GCT TTG GCT TTA CTC ACG     | 14765 - 115910  |
| <b>as5</b>    | CGG ATC GTA TTA CTA CAG AGT C | TTG ATA CCA CCA GGA ATA GG  | 18317 - 19388   |
| <b>as6</b>    | TAT TCT CCG TAT CAG GTA TTT   | CGA TGA CTT ACG CCT TAC C   | 32887 - 33176   |
| <b>as7</b>    | AAA GTA AGT GGA CCT GAC CC    | GGT AAA TCC ACG AAC TCA AT  | 33501 - 34550   |
| <b>as8</b>    | TAT CAA CCA CTC AGC CAT CT    | AAT CCT CCA AGC TAC CAA C   | 37448 - 37800   |
| <b>as9</b>    | ACC CGT TGT ATT TGC TTC TC    | AAA TCC TGT CTC CGC AAC     | 37892 - 38536   |
| <b>as10</b>   | TAG GCA TAG GTA GCA ATC CAT   | GCT ACG CCT TGA ACC ACT     | 46418 - 47284   |
| <b>as11</b>   | AGG ACCAGA AGT AGC AGG AT     | AAT CCC TCC CTA CAA CTC AT  | 56341 - 57122   |
| <b>as12</b>   | TAG GTA GGG ATG ACA GGA TT    | TTC ATT CCT TCC CGT GT      | 69102 - 69730   |
| <b>as13</b>   | ACT ATG ATG GTT CCG TTG C     | TTAC CCT AAT CAA CCG ACT T  | 72977 - 73629   |
| <b>as14</b>   | ATT TAG GCA GAA TAC CGT CA    | CTG GAG GGA TAA GAG GAT T   | 112381 - 113010 |
| <b>as15</b>   | AGT TCT GCT TCG GTA TTG C     | TGG ATG GGA ATG AAT GAA G   | 117230 - 127643 |
| <b>as16</b>   | GAT TGT GCT TGT TCT ATC AGT   | GGG AAT GGA GGC TGA ACT     | 128912 - 129330 |
| <b>as17</b>   | TTC CAT AAC TTT GCC GTG T     | CTA AAC AGG AAC AAG AGG GA  | 130884 - 131285 |
| <b>as18</b>   | CAC TTG GCT ACCCAG CGT TT     | GCA CCT GGA CAG AAA GAC CCT | 134008 - 134695 |
| <b>as19</b>   | CGG TAG TAC CCT CGT TGA CTT   | CAA CAG TCG GAC AAG TGG G   | 86105 - 87020   |
| <b>as20</b>   | CTT CGT CGC CGT AGT AAA TAG   | GGC TCC CTA TTC AGT GCT ATG | 156995 - 901    |

*C. taliensis*

| <b>primer</b> | <b>forward</b>             | <b>reverse</b>             | <b>position</b> |
|---------------|----------------------------|----------------------------|-----------------|
| <b>ta1</b>    | TGGGAGCAATGAATAGGTACGAAT   | AAGACCGCTCAATAAATGAAATGCC  | 4940 - 5542     |
| <b>ta2</b>    | CGTTGCTTTCTACCACATCGTTTC   | CAGTCTATCTGATAAATCCCCATTC  | 6138 - 6825     |
| <b>ta3</b>    | TTAGCAATCCGCCGCTTTAGTCC    | AAAAGGACTTTGTTTCTACCGAGCT  | 9082 - 10203    |
| <b>ta4</b>    | ATGGATTGCTGTTTGCTTACTGGC   | CCCCAGATGGTGAAAGAATCGTCCGT | 25078 - 25567   |
| <b>ta5</b>    | GTAGACATTCCTTCATTTCCATCCC  | ACCATTA ACTATTGACTACGGACTG | 27785 - 28761   |
| <b>ta6</b>    | CATATTGCCAACGAATTTACAGTCC  | TTGAACCGATGACTTACGCCTTACC  | 32166 - 33157   |
| <b>ta7</b>    | CCGACAATGTAATGGAGAATGGAT   | TCCTTTATTGGTCTATAACCCTGAC  | 33959 - 34578   |
| <b>ta8</b>    | AAAATAGTTGGAATCGCCCTGAAGA  | TTTGGTAGCTCGCAAGGCTCATAAC  | 38167 - 38550   |
| <b>ta9</b>    | TAATCATGAGTCCTCCTTTCCG     | CTTAGTAATGGCTAATGACTGCTTG  | 43646 - 44077   |
| <b>ta10</b>   | TTCTGAGTGAGTTATTTACAGTCCAC | GCCGCATGTTATACCATATTTCACT  | 60560 - 61545   |
| <b>ta11</b>   | GCTACAGCAGCCGGTATAGTAAGC   | CCGTTCTATTTCCCGTTATT       | 64789 - 65580   |
| <b>ta12</b>   | CCCTCTGGTTGAATCATAACGACTT  | GACTAGAAGGAATCGGCGGAGAAAT  | 82310 - 82642   |
| <b>ta13</b>   | TCCCTTCATTCTTCTCTATGTTGT   | TAGTGATTCAATGGTCGGGATGG    | 84054 - 84570   |
| <b>ta14</b>   | GGCATTACGACCTTTACCACAACGA  | TTTTCCGATCCAGTTCCTCCACCAC  | 88123 - 89417   |
| <b>ta15</b>   | AGCAACAACATAATGGAGGCAGTC   | AAATGGTGATATTGTTCTCCGTTG   | 91005 - 91742   |
| <b>ta16</b>   | GGAGCAAAAGGTATGATCCACG     | GAATTCCTACCCAGAACTAGAAAT   | 115003 - 116140 |

|             |                           |                            |                 |
|-------------|---------------------------|----------------------------|-----------------|
| <b>ta17</b> | CTGGGAAGAACCAAAGTTTCAGATT | TATGGATCACCATTCCAAGT       | 127345 - 127798 |
| <b>ta18</b> | AATACATATGCTTGTGACAAGGAGG | TCTGACTGATAGAACAAGCACAATC  | 128482 - 128910 |
| <b>ta19</b> | AAATGGAATGGTATCCCAGGCTTCT | AAGGTTCAATGCGAGCCCAAAGATG  | 129690 - 129970 |
| <b>ta20</b> | TGCCGTATCCAGACTAATACCAATC | ATCTAGCATTGGGTAGACCTCATAAC | 131507 - 131823 |
| <b>ta21</b> | TGGTCTGTGAAGATGCGTTGTTAGG | TCCAAGGCACATTAGCATGGCGTAC  | 138467 - 138740 |
| <b>ta22</b> | CCCAAGGACTCAATCGTATGGATAT | GACGTGACATGAGCGTGAAAGAGGT  | 143364 - 143640 |
| <b>ta23</b> | AATGGTGATATTGTTCCCTCCGTTG | GAGCAGAAGAGCCGTTTTCAAGTAG  | 152010 - 152371 |
| <b>ta24</b> | TTGTAGGTATAATGGTGGAT      | AAGCGTCCTGTAGTAAGAG        | 85782 - 86940   |
| <b>ta25</b> | TCCGAGTGAATGGAAAAGG       | AAGGCATCAAAATATGTAGGG      | 112584 - 112890 |
| <b>ta26</b> | ATAAACTGGGTGGAAACG        | AAACAGGAACAAGAGGGA         | 130849 - 131284 |
| <b>ta27</b> | AGTTATGAACCCTGTAGACC      | TAAGGCAGTGGATTGTGA         | 156851 - 52     |

---

***C. oleifera***

---

| <b>primer</b> | <b>forward</b>     | <b>reverse</b>     | <b>position</b> |
|---------------|--------------------|--------------------|-----------------|
| <b>ol1</b>    | TAACATTAGCGACGAGAT | TATGAACCCTGTAGACCA | 86208 - 86710   |
| <b>ol2</b>    | CGAAACTACCTGTTATCC | TAGGAGCGGGACTTCTTC | 114226 - 114770 |
| <b>ol3</b>    | TTTTATGTATCGCAACGG | AAACAGGAACAAGAGGGA | 130731 - 131058 |
| <b>ol4</b>    | AAGCGTTGGCTAGGTAAG | TCAGGAAGGCGTTATTGT | 156597 - 389    |

---
