# Supplementary material for: Contradiction between Plastid Gene Transcription and Function Due to Complex Posttranscriptional Splicing: An Exemplary Study of ycf15 Function and Evolution in Angiosperms
Source: PubMed Central journal article supplement (PMC3601113; doi:10.1371/journal.pone.0059620), 2013-03-18
Supplement: pone.0059620.s006.pdf [file pone.0059620.s006.pdf]

**Table S3 – Taxa included in the phylogenetic analyses with GenBank accession numbers.**

| <b>Classification</b>         | <b>Taxon</b>                                    | <b>Genbank accessions</b> |
|-------------------------------|-------------------------------------------------|---------------------------|
| <b>Gymnosperms</b>            |                                                 |                           |
|                               | <i>Pinus thunbergii</i>                         | NC_001631                 |
|                               | <i>Cycas taitungensis</i>                       | NC_009618                 |
| <b>Early diverging groups</b> |                                                 |                           |
|                               | <i>Amborella trichopoda</i>                     | NC_005086                 |
|                               | <i>Nymphaea alba</i>                            | NC_006050                 |
|                               | <i>Nuphar advena</i>                            | NC_008788                 |
|                               | <i>Illicium oligandrum</i>                      | NC_009600                 |
|                               | <i>Chloranthus spicatus</i>                     | NC_009598                 |
|                               | <i>Drimys granadensis</i>                       | NC_008456                 |
|                               | <i>Piper cenocladum</i>                         | NC_008457                 |
|                               | <i>Calycanthus floridus</i> var. <i>glaucus</i> | NC_004993                 |
|                               | <i>Magnolia kwangsiensis</i>                    | NC_015892                 |
|                               | <i>Liriodendron tulipifera</i>                  | NC_008326                 |
|                               | <i>Nandina domestica</i>                        | NC_008336                 |
|                               | <i>Ranunculus macranthus</i>                    | NC_008796                 |
|                               | <i>Platanus occidentalis</i>                    | NC_008335                 |
|                               | <i>Buxus microphylla</i>                        | NC_009599                 |
|                               | <i>Ceratophyllum demersum</i>                   | NC_009962                 |
| <b>Monocots</b>               |                                                 |                           |
|                               | <i>Acorus calamus</i>                           | NC_007407                 |
|                               | <i>Wolffia australiana</i>                      | NC_015899                 |
|                               | <i>Lemna minor</i>                              | NC_010109                 |
|                               | <i>Phalaenopsis aphrodite</i>                   | NC_007499                 |
|                               | <i>Dioscorea elephantipes</i>                   | NC_009601                 |
|                               | <i>Phoenix dactylifera</i>                      | NC_013991                 |
|                               | <i>Typha latifolia</i>                          | NC_013823                 |
|                               | <i>Oryza nivara</i>                             | NC_005973                 |
|                               | <i>Triticum aestivum</i>                        | NC_002762                 |
|                               | <i>Hordeum vulgare</i>                          | NC_008590                 |
|                               | <i>Zea mays</i>                                 | NC_001666                 |
|                               | <i>Sorghum bicolor</i>                          | NC_008602                 |
|                               | <i>Saccharum</i> hybrid cultivar<br>SP-80-3280  | NC_005878                 |
| <b>Rosids</b>                 |                                                 |                           |
|                               | <i>Vitis vinifera</i>                           | NC_007957                 |
|                               | <i>Populus alba</i>                             | NC_008235                 |
|                               | <i>Hevea brasiliensis</i>                       | NC_015308                 |
|                               | <i>Manihot esculenta</i>                        | NC_010433                 |

---

|                       |                                                      |                 |
|-----------------------|------------------------------------------------------|-----------------|
|                       | <i>Castanea mollissima</i>                           | NC_014674       |
|                       | <i>Cucumis sativus</i>                               | NC_007144       |
|                       | <i>Prunus persica</i>                                | NC_014697       |
|                       | <i>Morus indica</i>                                  | NC_008359       |
|                       | <i>Glycine max</i>                                   | NC_007942       |
|                       | <i>Phaseolus vulgaris</i>                            | NC_009259       |
|                       | <i>Lotus japonicus</i>                               | NC_002694       |
|                       | <i>Cicer arietinum</i>                               | NC_011163       |
|                       | <i>Medicago truncatula</i>                           | NC_003119       |
|                       | <i>Cicer arietinum</i>                               | NC_011163       |
|                       | <i>Eucalyptus grandis</i>                            | NC_014570       |
|                       | <i>Oenothera argillicola</i>                         | NC_010358       |
|                       | <i>Pelargonium x hortorum</i>                        | NC_008454       |
|                       | <i>Citrus sinensis</i>                               | NC_008334       |
|                       | <i>Gossypium arboreum</i>                            | NC_016712       |
|                       | <i>Theobroma cacao</i>                               | NC_014676       |
|                       | <i>Carica papaya</i>                                 | NC_010323       |
|                       | <i>Aethionema cordifolium</i>                        | NC_009265       |
|                       | <i>Arabis hirsuta</i>                                | NC_009268       |
|                       | <i>Nasturtium officinale</i>                         | NC_009275       |
|                       | <i>Arabidopsis thaliana</i>                          | NC_000932       |
| <b>Caryophyllales</b> |                                                      |                 |
|                       | <i>Spinacia oleracea</i>                             | NC_002202       |
|                       | <i>Fagopyrum esculentum</i>                          | NC_010776       |
| <b>Asterids</b>       |                                                      |                 |
|                       | <b><i>Camellia sinensis</i> var. <i>assamica</i></b> | <b>JQ975030</b> |
|                       | <b><i>C. oleifera</i></b>                            | <b>JQ975031</b> |
|                       | <b><i>C. taliensis</i></b>                           | <b>JQ975032</b> |
|                       | <i>Coffea arabica</i>                                | NC_008535       |
|                       | <i>Jasminum nudiflorum</i>                           | NC_008407       |
|                       | <i>Olea europaea</i>                                 | NC_013707       |
|                       | <i>Boea hygrometrica</i>                             | NC_016468       |
|                       | <i>Sesamum indicum</i>                               | NC_016433       |
|                       | <i>Ipomoea purpurea</i>                              | NC_009808       |
|                       | <i>Cuscuta exaltata</i>                              | NC_009963       |
|                       | <i>Nicotiana tabacum</i>                             | NC_001879       |
|                       | <i>Atropa belladonna</i>                             | NC_004561       |
|                       | <i>Solanum bulbocastanum</i>                         | NC_007943       |
|                       | <i>Panax ginseng</i>                                 | NC_006290       |
|                       | <i>Eleutherococcus senticosus</i>                    | NC_016430       |
|                       | <i>Oxypolis greenmanii</i>                           | NC_015832       |
|                       | <i>Crithmum maritimum</i>                            | NC_015804       |
|                       | <i>Petroselinum crispum</i>                          | NC_015821       |
|                       | <i>Anthriscus cerefolium</i>                         | NC_015113       |

---

---

|                             |           |
|-----------------------------|-----------|
| <i>Daucus carota</i>        | NC_008325 |
| <i>Trachelium caeruleum</i> | NC_010442 |
| <i>Lactuca sativa</i>       | NC_007578 |
| <i>Jacobaea vulgaris</i>    | NC_015543 |
| <i>Ageratina adenophora</i> | NC_015621 |
| <i>Helianthus annuus</i>    | NC_007977 |
| <i>Guizotia abyssinica</i>  | NC_010601 |

---
